# Supplementary material for: Identification and characterization of a novel β-D-galactosidase that releases pyruvylated galactose
Source: PubMed Central journal article supplement (PMC6090015; doi:10.1038/s41598-018-30508-4), 2018-08-13
Supplement: 41598_2018_30508_MOESM1_ESM.pdf [file 41598_2018_30508_MOESM1_ESM.pdf]

1 **Supplementary Information**

2

3 **Identification and characterization of a novel  $\beta$ -D-galactosidase that releases**  
4 **pyruvylated galactose**

5

6 Yujiro Higuchi<sup>1</sup>, Hitomi Matsufuji<sup>1</sup>, Masanari Tanuma<sup>2</sup>, Takatoshi Arakawa<sup>2</sup>, Kazuki Mori<sup>1</sup>,  
7 Chihaya Yamada<sup>2</sup>, Risa Shofia<sup>1</sup>, Emiko Matsunaga<sup>1</sup>, Kosuke Tashiro<sup>1</sup>, Shinya Fushinobu<sup>2</sup>,  
8 Kaoru Takegawa<sup>1,\*</sup>

9

10 <sup>1</sup>Department of Bioscience and Biotechnology, Faculty of Agriculture, Kyushu University, 6-  
11 10-1 Hakozaki, Fukuoka 812-8581, Japan

12 <sup>2</sup>Department of Biotechnology, The University of Tokyo, 1-1-1 Yayoi, Bunkyo-ku, Tokyo 113-  
13 8657, Japan.

14

15 \*Corresponding author. Tel/Fax: +81 92 642 2851, E-mail address: takegawa@agr.kyushu-  
16 u.ac.jp (K. Takegawa)

17

18 Number of words: Abstract, 200; Main, 5005.

19 Number of figures: Main, 8; Supplementary, 1.

20 Number of tables: Main, 4; Supplementary, 1.

21

22 Key words: *Bacillus* species,  $\beta$ -D-galactosidase, galactomannan, pyruvylated galactose

23

24 Running title: Pyruvylated-galactose-releasing galactosidase

25 **Supplementary figure legend**

26 **Supplementary Figure S1. Image of the original SDS-PAGE gel that was cropped and**  
27 **used in Figure 2A.**

28 Shown is the full image of the original SDS-PAGE gel that was cropped and used in Figure  
29 2A. Lane M, molecular weight markers; lane 1, supernatant; lane 2, pellet; lane 3, flow  
30 through; lane 4, wash; lanes 5-11, elution.

31 **Supplementary Figure S1**

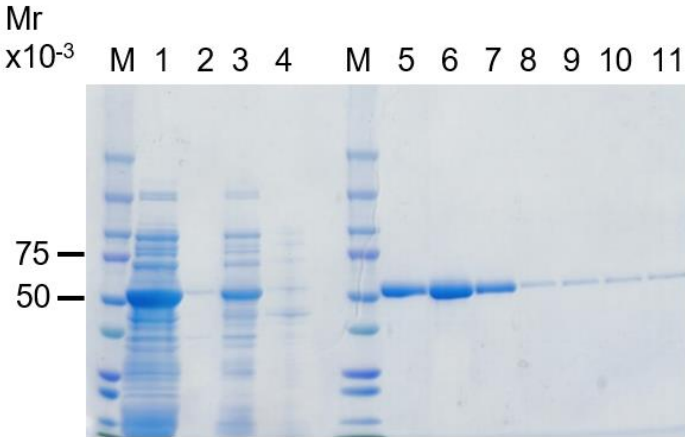

32

33 **Supplementary Table 1. Primers used in this study.**

| Target                   | Sequence (5' to 3'; upper, forward; lower, reverse)                                                   |
|--------------------------|-------------------------------------------------------------------------------------------------------|
| 16S rRNA gene            | AGAGTTTGATCMTGGCTCAG (M: A or C)<br>GGYTACCTTGTTACGACTT (Y: A, T or C)                                |
| pET-32b                  | CACCACCACCACCACCACTGAGAT<br>ATGTATATCTCCTTCTTAAAGTTA                                                  |
| ORF1119                  | GAAGGAGATATACATATGAAGTTTCCACATGATTTT<br>GTGGTGGTGGTGGTGTGCATTATAACTCTTCCCCTCTC                        |
| ORF1119<br>(for His tag) | GAAGGAGATATACATATGAAGTTTCCACATGATTTT<br>GTGGTGGTGGTGGTGTAACTCTTCCCCTCTC                               |
| ORF4395                  | GAAGGAGATATACATCATGACTGGAATTAATAATTGCT<br>GTGGTGGTGGTGGTGTGCATTACTTCTCTACCTTTTTTAAA                   |
| ORF4971                  | GAAGGAGATATACATCATGAAGGATTGGCATAAAAAG<br>GTGGTGGTGGTGGTGTGCATTATTTTCGTATATCGATACAC                    |
| BglC                     | GAAGGAGATATACATATGAAATTTTCTAAAGACTTTCTATTTGGAG<br>GTGGTGGTGGTGGTGAAGATTTTCGCCTCTCTCTTC                |
| BglH                     | GAAGGAGATATACATATGAGTTCAAATGAAAAACG<br>GTGGTGGTGGTGGTGGAGACTCTCTCCGTTTG                               |
| H118A                    | TTATAT <sub>gct</sub> TGGGATTTACCATTACCGTTAGAAAAAG<br>ATCCCA <sub>agc</sub> ATATAAAGTGACAAACGGCACAATC |
| E163A                    | TTAAT <sub>gct</sub> ACCGTAATGTTTTGTGGATTAGG<br>TACGGT <sub>agc</sub> ATTAATAAGTAATCCAATGCTTAAC       |
| S427A                    | CTTTTA <sub>gct</sub> TGGTTAAATGGATATAAA<br>AGTCACTAACTAGAAAAT <sub>cga</sub> ACCAAT                  |

|       |                                                            |
|-------|------------------------------------------------------------|
| S427E | CTTTTAgaaTGGTTAAATGGATATAAA<br>AGTCACTAACTAGAAAATcttACCAAT |
| N430A | TGGTTAgctGGATATAAAAAGCAATAT<br>CTAGAAAATTCAACCAATcgaCCTATA |
| N430Y | TGGTTAtatGGATATAAAAAGCAATAT<br>CTAGAAAATTCAACCAAtataCCTATA |
| K434A | TATAAAgctCAATATGGCTTTATTTTT<br>ACCAATTTACCTATATTTcgaGTTATA |
| Y436A | AAGCAAgctGGCTTTATTTTTGTCGAT<br>TTACCTATATTTTTCGTTcgaCCGAAA |
| Y436F | AAGCAAttGGCTTTATTTTTGTCGAT<br>TTACCTATATTTTTCGTTaaaCCGAAA  |

---

- 34 Lower case characters represent nucleotides where point mutations were introduced.
- 35 The nucleotide sequence of ORF1119 was used as a template for all point mutants.
